# Supplementary material for: Delineating the role of crystallinity in the electrocatalytic activity of colloidally synthesized MoP nanocrystals
Source: Royal Society of Chemistry journal article supplement (doi:10.1039/d0nj02800b), 2020-01-01
Supplement: d0nj02800b1.pdf [file d0nj02800b1.pdf]

Electronic Supplementary Information (ESI) for New Journal of Chemistry

**Delineating the role of crystallinity on the electrocatalytic activity of  
colloidally synthesized MoP nanocrystals**

Siyabonga S. Nkabinde, Zakhele B. Ndala, Ndivhuwo P. Shumbula, Tshwarela Kolokoto,  
Obakeng Nchoe, Grace N. Ngubeni, Kalenga P. Mubiayi, Nosipho Moloto\*

*Molecular Sciences Institute, School of Chemistry, University of the Witwatersrand, Private  
Bag 3, Wits, 2050, South Africa*

\*Corresponding authors: Nosipho Moloto

Email: [Nosipho.Moloto@wits.ac.za](mailto:Nosipho.Moloto@wits.ac.za)

Tel: +2711 7176774

Fax: +2711 7176749

## Supporting information

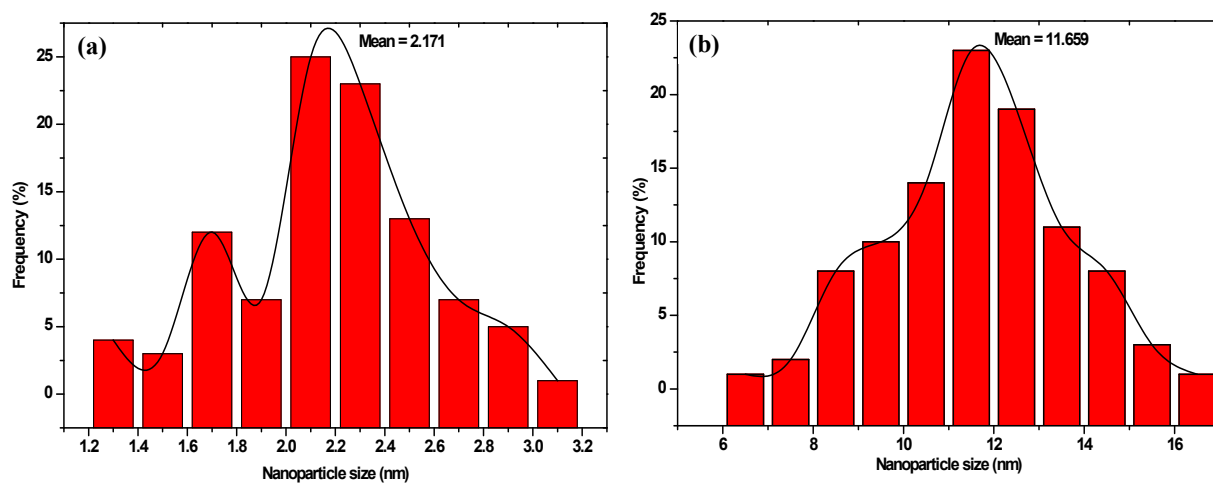

**Fig. S1: The size distributions of (a) A-MoP and (b) C-MoP nanocrystals as determined from TEM images (N = 100).**

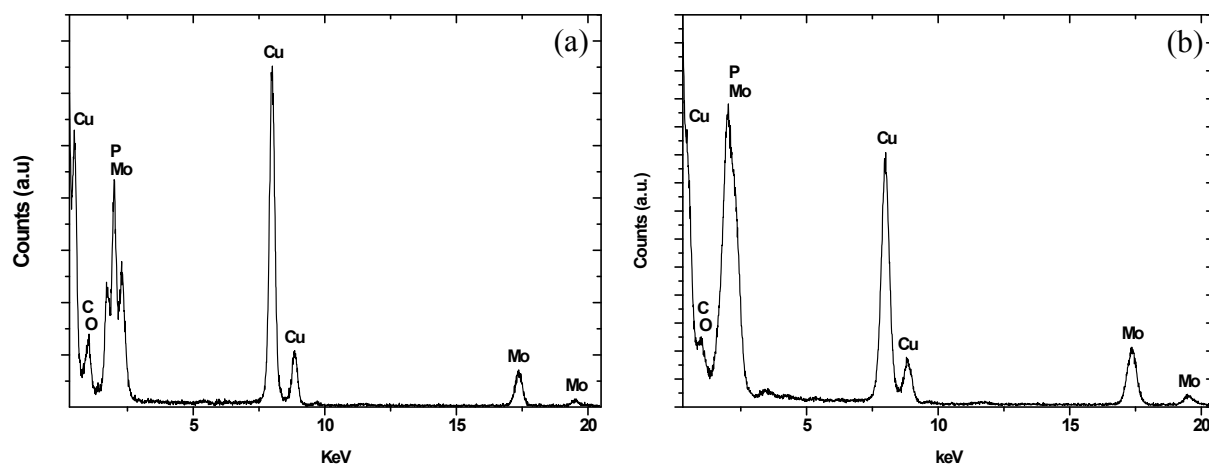

**Fig. S2: EDX spectra of (a) amorphous A-MoP and (b) crystalline C-MoP(2 h) nanocrystals.**

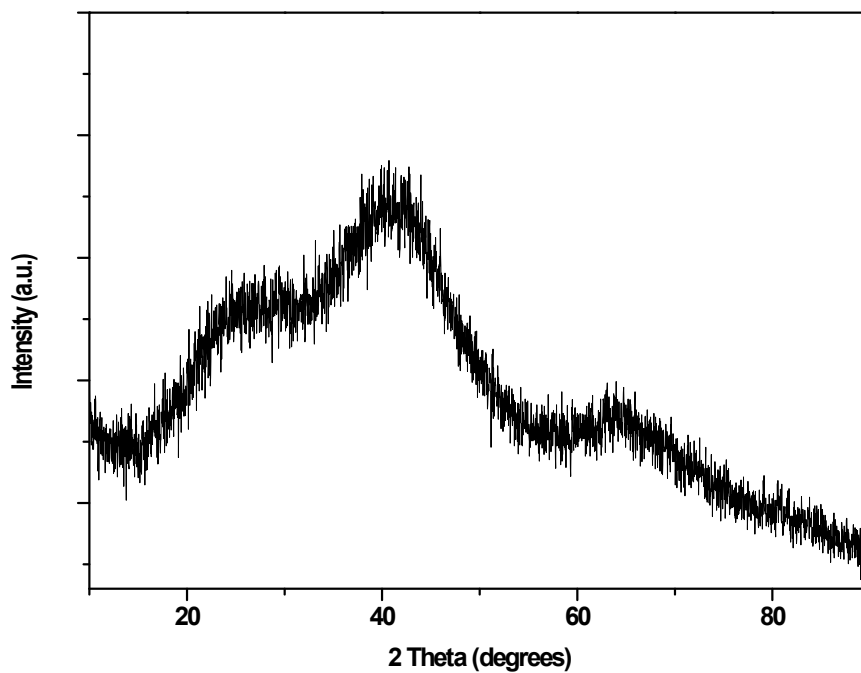

**Fig. S3: XRD pattern of long term stored amorphous A-MoP.**

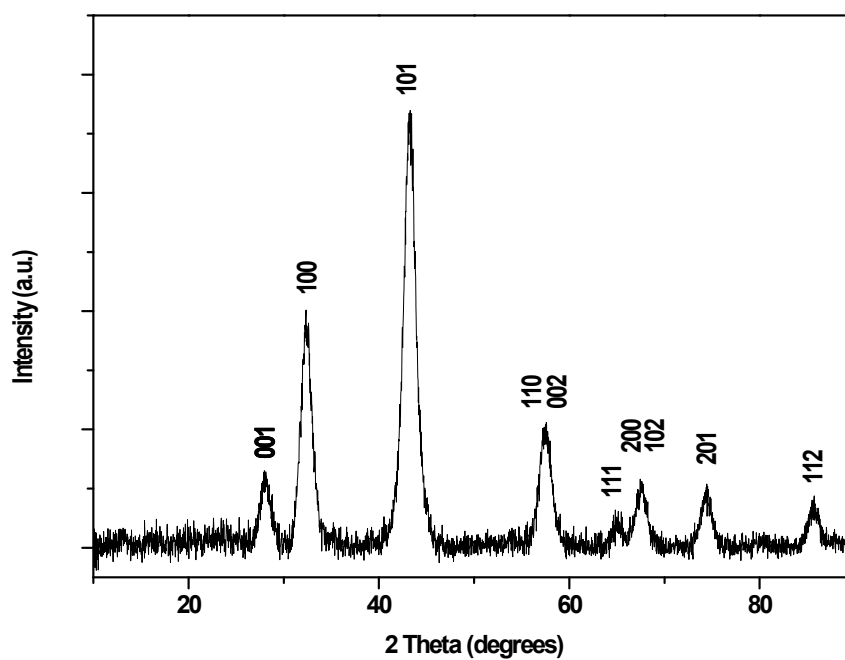

**Fig. S4: XRD pattern of long term stored amorphous C-MoP.**

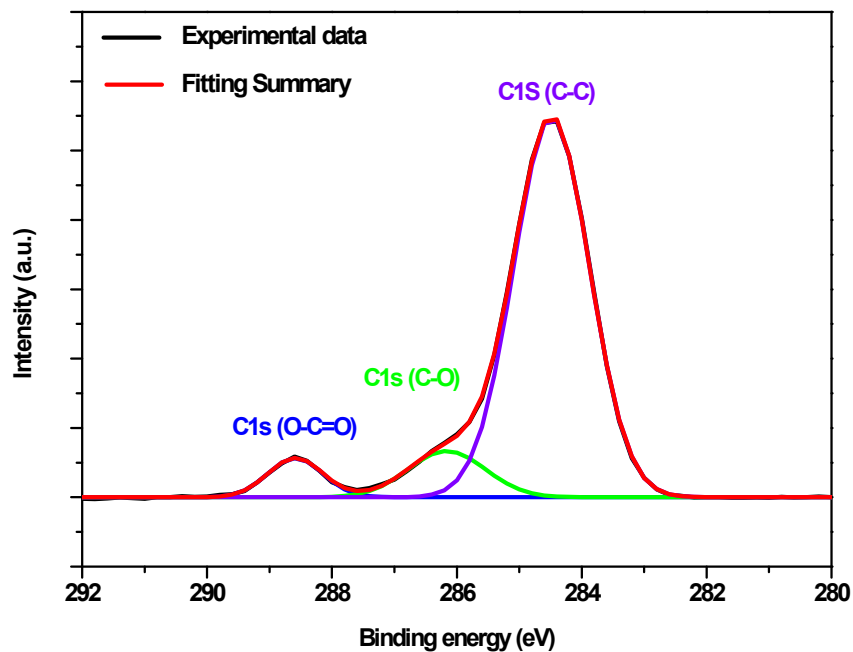

Fig. S5: High-resolution spectrum of C 1s of A-MoP.

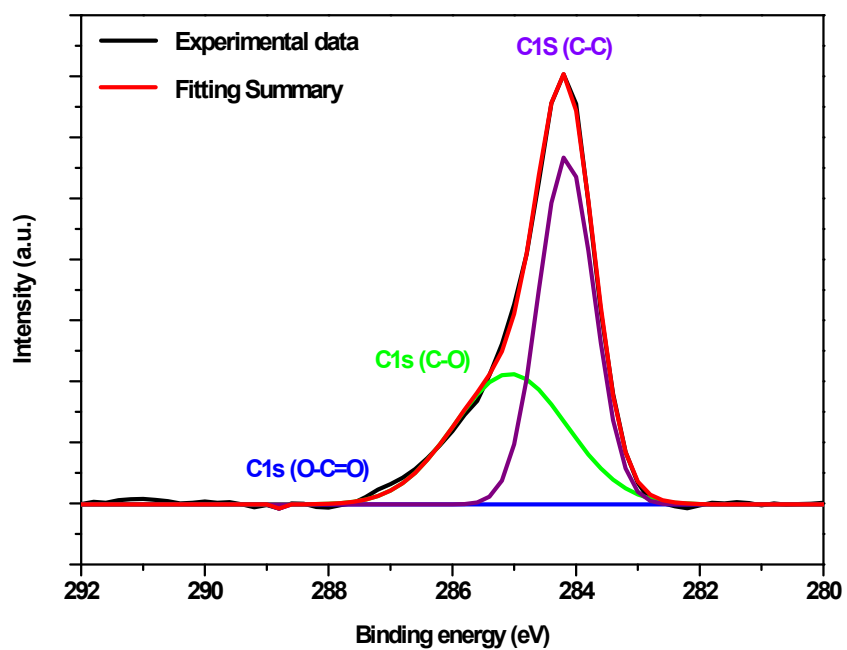

Fig. S6: High-resolution spectrum of C 1s of C-MoP.
